# Supplementary material for: Predictors of high flow oxygen therapy failure in COVID-19-related severe hypoxemic respiratory failure
Source: PubMed Central journal article supplement — J Thorac Dis. 2022 Apr;14(4):851–6. doi: 10.21037/jtd-21-1373 (PMC9096326; doi:10.21037/jtd-21-1373), 2022-04
Supplement: jtd-14-04-851-dss.pdf [file jtd-14-04-851-dss.pdf]

## Data Sharing Statement

|                     |                                                                                                                                                    |                                                                                                               |
|---------------------|----------------------------------------------------------------------------------------------------------------------------------------------------|---------------------------------------------------------------------------------------------------------------|
| <b>Article Info</b> | <a href="https://dx.doi.org/10.21037/jtd-21-1373">https://dx.doi.org/10.21037/jtd-21-1373</a>                                                      |                                                                                                               |
| <b>Item</b>         | <b>Question</b>                                                                                                                                    | <b>Authors' Response<br/>(place "-" if not applicable)</b>                                                    |
| 1                   | Would you like to share data collected for your study to others?                                                                                   | Yes                                                                                                           |
| 2                   | If not, would you like to share the reason for your decision?                                                                                      | -                                                                                                             |
| 3                   | What data in particular will be shared?                                                                                                            | Demographics, physical and clinical parameters that are associated with HFNC treatment failure and intubation |
| 4                   | Any other documents will be share? Such as study protocol, statistical analysis plan, informed consent form, clinical study report, analytic code. | Statistical analysis methods and tables                                                                       |
| 5                   | When will data availability begin?                                                                                                                 | From the publication date                                                                                     |
| 6                   | When will data availability end?                                                                                                                   | -                                                                                                             |
| 7                   | To whom will you share the data?                                                                                                                   | To all doctors who work in Covid-19 clinics and use HFNC for the treatment of critical Covid-19 disease       |
| 8                   | For what type of analysis or purpose?                                                                                                              | For the study of HFNC treatment and the prediction of its success in patients with critical Covid19 disease   |
| 9                   | How or where can the data/documents be obtained?                                                                                                   | Emails could be sent to the address below to obtain the shared data:<br>felicitypol@gmail.com.                |
| 10                  | Any other restrictions?                                                                                                                            | No                                                                                                            |
